# Supplementary material
Source: ML conference proceedings conference paper supplement (https://openreview.net/forum?id=Ag-vOezQ0Gw)
Supplement: supplementary_material [file attachment]

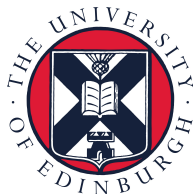

**The  
Alan Turing  
Institute**

**KING'S**  
*College*  
**LONDON**

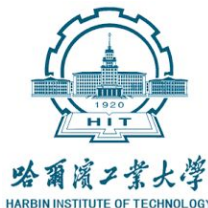

**HIRI**  
Honda Research Institute **EU**

# ROS-PyBullet Interface

[https://github.com/ros-pybullet/ros\\_pybullet\\_interface](https://github.com/ros-pybullet/ros_pybullet_interface)

`christopher.mower@kcl.ac.uk`

Workshop 26 April 2022

Christopher E. Mower, Theodoros Stouraitis, Lei Yan, João Moura, Christian Rauch  
Nazanin Zamani Behabadi, Michael Gienger, Tom Vercauteren, Christos Bergeles, Sethu Vijayakumar

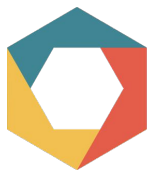

**Harmony**

Assistive robots for healthcare

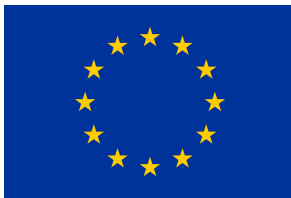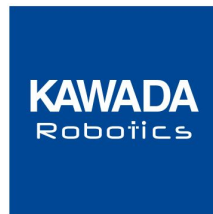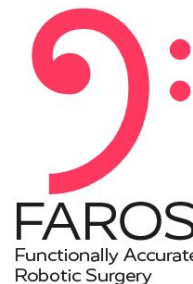

# Prerequisites

- Knowledge
  - Familiarity with ROS
    - [Topics, Messages, Services, Publishers, Subscribers, Parameters, etc](#)
  - Familiarity with [Pybullet](#) (helps but not essential)
- Setup (ideal)
  - Ubuntu 20.04
  - ROS Noetic
  - Python 3.7>=
  - [catkin tools](#) (\$ sudo pip3 install -U catkin\_tools)
- Other setups that *should* work
  - Ubuntu 18.04
  - ROS Melodic
- Not supported!
  - ROS2 (currently)
  - Python 2

# Pybullet

- [Pybullet](#) is a python wrapper for the Bullet physics library
- Created by [Erwin Coumans](#)
- Bullet is accepted in community as a reliable simulator for modelling contact/impact

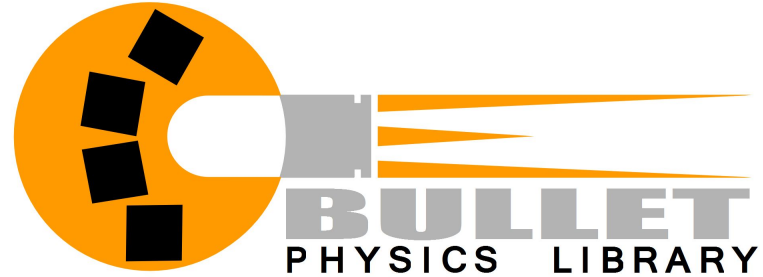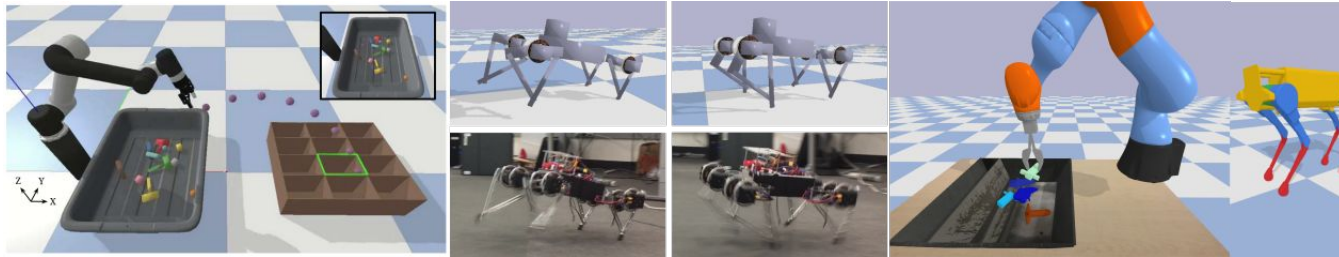

# In a nutshell...

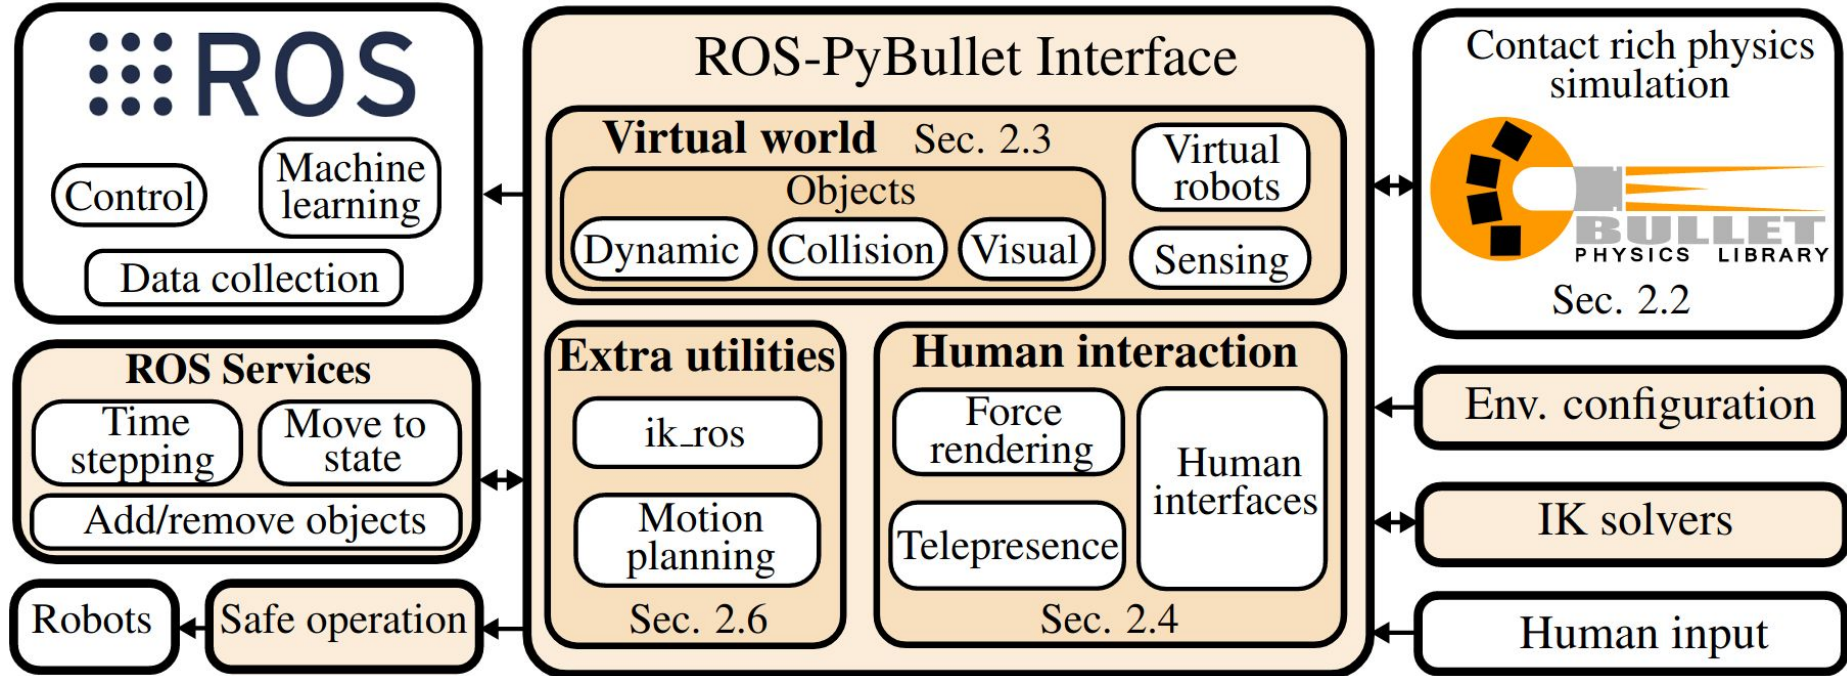

# History

- In development ~2 years, public release coming soon
- Motivation
  - Reliable contact modelling
  - Connection to ROS
  - Easily interface with hardware
  - Easily develop/prototype
- Started by Chris/Theo
- Other contributors
  - Lei Yan
  - João Moura
  - Christian Rauch
  - Nazanin Zamani Behabadi
- Work utilizing framework
  - [Mower2021a, Moura2021, Li2022, Stouraitis2021, Mower2021b]

[Mower2021a] C. E. Mower, J. Moura, S. Vijayakumar, [Skill-based Shared Control](#), R:SS, 2021.

[Moura2021] J. Moura, T. Stouraitis, S. Vijayakumar, [Non-prehensile Planar Manipulation via Trajectory Optimization with Complementarity Constraints](#), arXiv, 2021 [accepted at ICRA 2022].

[Li2022] S. Li, T. Stouraitis, M. Gienger, S. Vijayakumar, J. A. Shah, [Set-based State Estimation with Probabilistic Consistency Guarantee under Epistemic Uncertainty](#), RAL, 2022.

[Stouraitis2021] T. Stouraitis, [Dyadic collaborative manipulation formalism for optimizing human-robot teaming](#), PhD Thesis, University of Edinburgh, 2021.

[Mower2021b] C. E. Mower, [An Optimization-based Formalism for Shared Autonomy in Dynamic Environments](#), PhD Thesis, University of Edinburgh, 2021.

# Alternatives?

|                     | ROS            | Languages  | Deform. Obj. | Hardware | HRI | Photo-realistic |
|---------------------|----------------|------------|--------------|----------|-----|-----------------|
| Drake               | ✗              | C++/Python | ✓            | ✗        | ✗   | ✗               |
| Gazebo              | ✓              | C++        | ✗            | ✓        | ✗   | ✗ <sup>3</sup>  |
| Nvidia Isaac        | ✓ <sup>4</sup> | Python     | ✗            | ✓        | ✗   | ✓               |
| MuJoCo <sup>5</sup> | ✗              | C++/Python | ✓            | ✗        | ✗   | ✗               |
| <b>ROS-PyBullet</b> | ✓              | Python     | ✓            | ✓        | ✓   | ✗ <sup>6</sup>  |

# Framework features

1. Online, full-physics simulation of robots using a reliable simulator for contacts.
2. Integration with ROS ecosystem.
3. Simulated sensing (e.g. F-T sensor, RGBD camera).
4. Several interfaces for humans.
5. Modular and extensible design.
6. Easily integrates with hardware.

# System overview

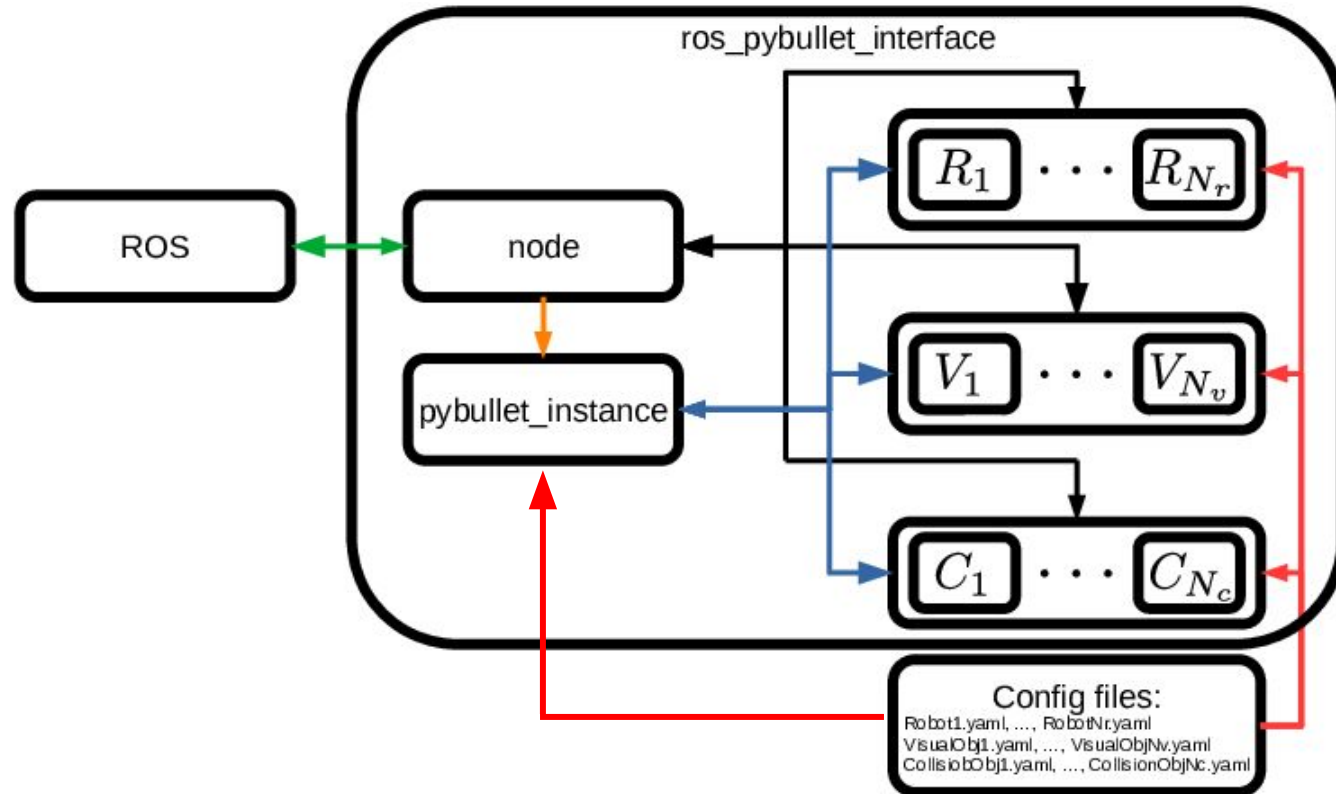



# Robots and building virtual worlds (1/5)

- PybulletObject
  - Initialize common variables
  - Methods to facilitate ROS communication
  - Load configuration files
  - Interface methods to Pybullet

# Robots and building virtual worlds (2/5)

- `PybulletRobot(PybulletObject)`
  - Simulates or visualizes robot
  - Supports both fixed based and non fixed based robots
  - Load from URDF (support for SDF and Mujoco files coming soon)
  - Target joint states: position/velocity/torque control are supported
  - Publishes joint/link state
  - Simulate F/T sensors
  - Services
    - Move to joint/end-effector state
    - Robot information

# Robots and building virtual worlds (3/5)

- `PybulletVisualObject(PybulletObject)`
  - Simply visualizes objects
  - No interaction with any other body
  - Use-case: visualize real world objects [Moura2021]

# Robots and building virtual worlds (4/5)

- `PybulletCollisionObject(PybulletObject)`
  - Model objects such as floors/walls/etc
  - Other bodies react to these objects, but they do not react (massless)
  - Use-case: represent a wiping surface [Mower2021]

# Robots and building virtual worlds (5/5)

- `PybulletDynamicObject(PybulletObject)`
  - Objects whose motion is fully defined by Pybullet
  - Initial pose and linear/angular velocity given
  - Pose broadcast to ROS
  - Use-case: simulate a pushing box [Moura2021]

# Communication with ROS

- Services
  - Add/remove pybullet objects programmatically
  - Robot
    - Move to joint state
    - Move to end-effector state
    - Robot information
  - Time-step: start, step, stop
- Topics/Messages
  - Status
  - Object pose
    - Dynamic object broadcasts /tf
    - Other objects pose specified by /tf
  - Robot
    - Current joint state /rpbi/ROBOT\_NAME/joint\_states (sensor\_msgs/JointState)
    - Target joint state /rpbi/ROBOT\_NAME/joint\_states/target (sensor\_msgs/JointState)
  - Simulated sensors (FT-sensors, RGBD camera)
  - Pybullet visualizer, i.e. control GUI viewer programmatically

# Additional features

- MPC utilities
  - Start, step, stop time via buttons in GUI
- IK utilities
  - [https://github.com/cmower/ik\\_ros](https://github.com/cmower/ik_ros) provides a standardized IK interface
  - Supports: [trac\\_ik](#), [EXOTica](#), [RBDL](#), pybullet
- Interpolation utilities
  - Interpolate planned trajectories
- Safe robot utilities
  - [https://github.com/cmower/safe\\_robot](https://github.com/cmower/safe_robot) provides a generalized safety checking node
  - Checks joint positions/velocities, link limits, self-collisions
  - Easy to plugin custom checks

# Summary

- Outline
  - Framework that integrates ROS with a reliable impact/contact simulator Pybullet
  - Supports several robot/tasks/interfaces
  - Open source
  - Easy to install, setup, and use
- Future work
  - Migrate to ROS2
  - Support other Pybullet features, e.g. virtual reality
  - Full documentation



# Now

- Install `ros_pybullet_interface` and dependencies
- Basic “hello, world” example
- Adding objects programmatically
- RGBD Sensor
- Inverse Kinematics using `ik_ros`
- Leverage ROS ecosystem (teleop+LfD)

# Installation

In theory...

1. [Create catkin workspace](#)
  - a. `$ mkdir -p your_catkin_ws/src && cd your_catkin_ws`
  - b. `$ catkin init`
2. `$ cd src`
3. `$ git clone git@github.com:ros-pybullet/ros_pybullet_interface.git`
4. `$ ./ros_pybullet_interface/install.sh # automatically calls catkin build`

# Basic “hello, world” example

1. `$ roslaunch rpbi_examples basic_example_kuka_lwr.launch`

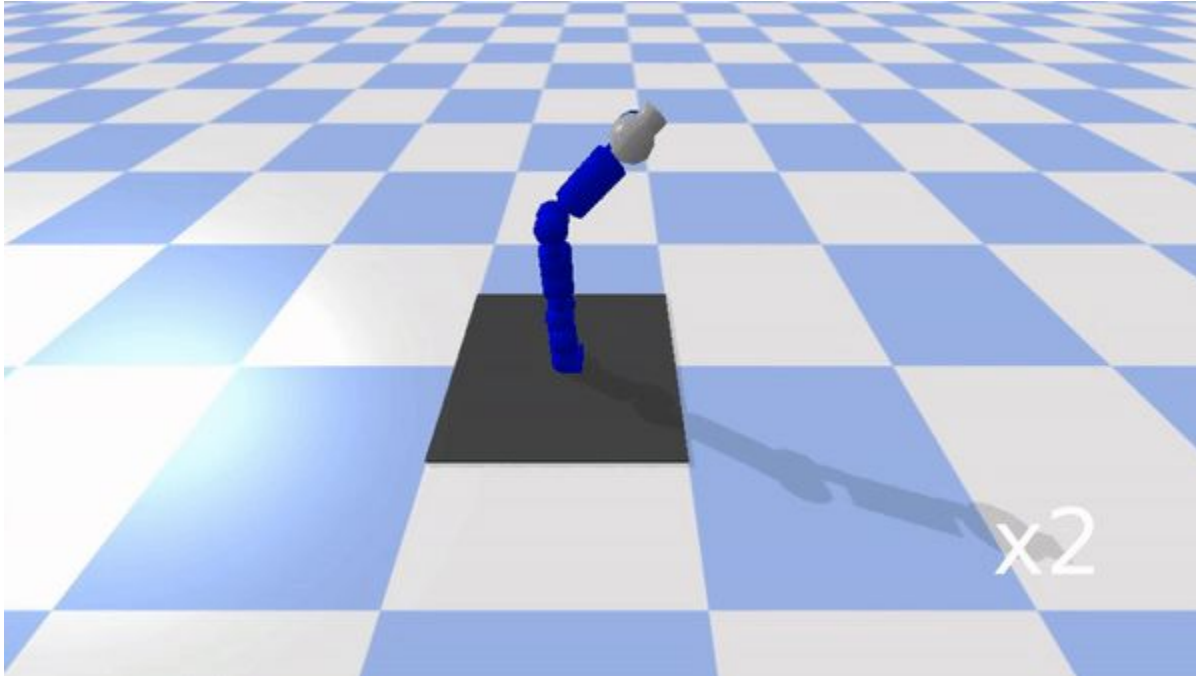

Note, this records an MP4 video and saves it to `$HOME/basic_example_kuka_lwr.mp4`

# Configuring a new robot and environment

- Main config file for `ros_pybullet_interface_node.py`
- Design of parameters:
  - When `camelCase` is used, this matches [Pybullet documentation](#) (if unspecified, default values specified in the documentation are used unless the variable is required, e.g. if `setGravity` is not specified in the config file then `gravD=0.0` for all  $D=\{X,Y,Z\}$ )
  - When `snake_case` is used, this means it is an interface specific parameters

```
#
# Pybullet instance
#
connect:
  connection_mode: 'GUI'
  options: '--mp4=$HOME/basic_example_kuka_lwr.mp4'

setGravity:
  gravX: 0.0
  gravY: 0.0
  gravZ: -9.81

timeStep: 0.01
start_pybullet_after_initialization: true
status_hz: 50

#
# Pybullet visualizer
#
configureDebugVisualizer:
  enable: 0
  flag: 'COV_ENABLE_GUI'

resetDebugVisualizerCamera:
  cameraDistance: 2.0
  cameraYaw: 0.0
  cameraPitch: -45.0
  cameraTargetPosition: [0.0, 0.0, 0.0]

#
# Pybullet objects
#
collision_objects:
  - "{rpbi_examples}/configs/floor.yaml"
robots:
  - "{rpbi_examples}/configs/basic_example_kuka_lwr/kuka_lwr.yaml"
rpbi_examples/configs/basic_example_kuka_lwr/config.yaml
```

# Configuring a new robot and environment

- Pybullet instance
  - General configuration of Pybullet
- Pybullet visualizer
  - Configuration of the visualization GUI
  - Also configurable/updateable via ROS
- Pybullet objects
  - visual\_objects
  - collision\_objects
  - dynamic\_objects
  - sensors
  - robots

Notice: Specify relative file names using  
{ros\_package\_name}

```
#
# Pybullet instance
#
connect:
  connection_mode: 'GUI'
  options: '--mp4=$HOME/basic_example_kuka_lwr.mp4'

setGravity:
  gravX: 0.0
  gravY: 0.0
  gravZ: -9.81

timeStep: 0.01
start_pybullet_after_initialization: true
status_hz: 50

#
# Pybullet visualizer
#
configureDebugVisualizer:
  enable: 0
  flag: 'COV_ENABLE_GUI'

resetDebugVisualizerCamera:
  cameraDistance: 2.0
  cameraYaw: 0.0
  cameraPitch: -45.0
  cameraTargetPosition: [0.0, 0.0, 0.0]

#
# Pybullet objects
#
collision_objects:
  - "{rpbi_examples}/configs/floor.yaml"
robots:
  - "{rpbi_examples}/configs/basic_example_kuka_lwr/kuka_lwr.yaml"
```

[rpbi\\_examples/configs/basic\\_example\\_kuka\\_lwr/config.yaml](#)

# Configuring a new robot and environment

- Each object must have a unique name
- Initial joint positions
  - Revolute joints assumed to be in radians unless flag is true (as in config)
  - Joints not specified default to 0.0
- Robot links can be broadcast as tf's
- Make robot visual (i.e. simply visualize the robot)
- Simulate F/T sensors

```
name: "kuka_lwr"

loadURDF:
  fileName: "{rpbi_examples}/robots/kuka_lwr.urdf"
  useFixedBase: 1
  basePosition: [0.5, 0., 0.]

initial_joint_position:
  lwr_arm_0_joint: 0.0
  lwr_arm_1_joint: 30.0
  lwr_arm_2_joint: 0.0
  lwr_arm_3_joint: -90.0
  lwr_arm_4_joint: 0.0
  lwr_arm_5_joint: 60.0
  lwr_arm_6_joint: 0.0

initial_revolute_joint_positions_are_deg: true
is_visual_robot: false

setJointMotorControlArrayParameters:
  controlMode: "POSITION_CONTROL"

enabled_joint_force_torque_sensors:
  - "lwr_arm_6_joint"

publish_joint_state_frequency: 30

publish_link_states: true
publish_link_states_frequency: 30
```

[rpbi\\_examples/configs/basic\\_example\\_kuka\\_lwr/kuka\\_lwr.yaml](#)

# Adding objects programmatically

1. `$ roslaunch rpbi_examples pybullet_objects_example.launch`

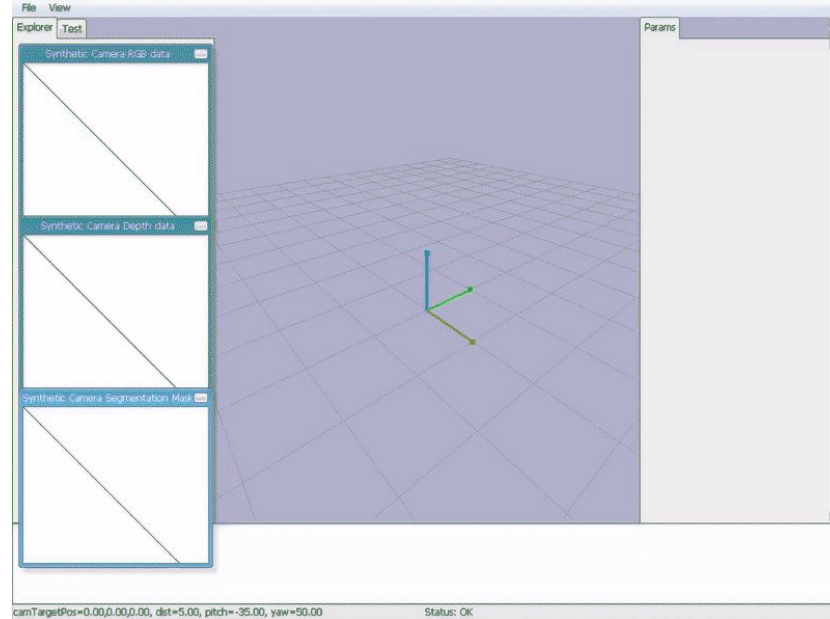

# Adding objects programmatically

- Services
- rpbi/add\_pybullet\_object
  - Add pybullet object from file
  - Add pybullet object from config (use [custom\\_ros\\_tools.config.config\\_to\\_str](#))
- rpbi/remove\_pybullet\_object
  - Removes object using name

```
from cob_srvs.srv import SetString, SetStringRequest
from ros_pybullet_interface.msg import PybulletObject
from ros_pybullet_interface.srv import AddPybulletObject

def add_pybullet_object():
    rospy.wait_for_service('rpbi/add_pybullet_object')
    try:
        handle = rospy.ServiceProxy(srv, AddPybulletObject)
        req = PybulletObject()
        req.object_type = PybulletObject.DYNAMIC
        req.filename = '{rpbi_examples}/configs/pybullet_objects_example/dynamic_box.yaml'
        resp = handle(req)
        if resp.success:
            rospy.loginfo('successfully added object')
        else:
            rospy.logwarn('failed to add object: %s' % resp.message)
    except Exception as e:
        rospy.logerr('failed to add object: %s' % str(e))

def remove_object():
    rospy.wait_for_service('rpbi/remove_pybullet_object')
    try:
        handle = rospy.ServiceProxy(srv, SetString)
        object_name = "dynamic_box"
        req = SetStringRequest(data=object_name)
        resp = handle(req)
        if resp.success:
            rospy.loginfo('successfully removed object')
        else:
            rospy.logwarn('failed to remove object: %s' % resp.message)
    except Exception as e:
        rospy.logerr('failed to remove object: %s' % str(e))
```



# RGBD Sensor

1. `$ roslaunch rpbi_examples pybullet_rgbd_example.launch`

- Simulate vision data
- Attach sensor to /tf (e.g. robot link)
- Limitation: only one can be instantiated at a time

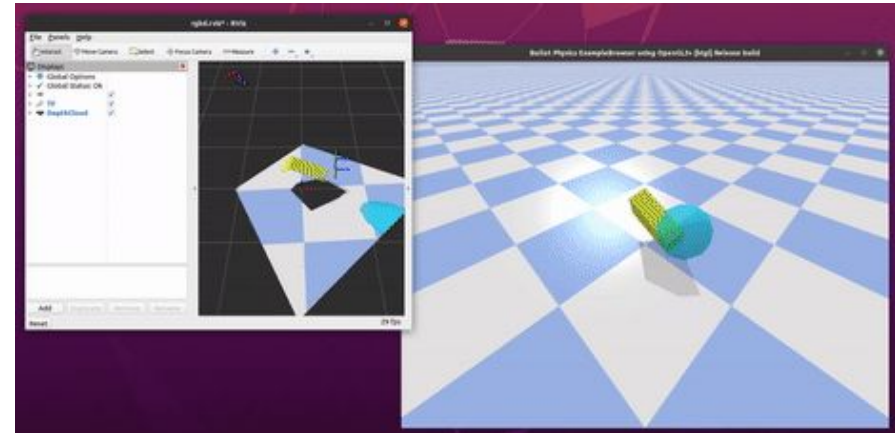

# Inverse Kinematics using ik\_ros

1. `$ roslaunch ik_ros_examples kuka_lwr_exotica_example.launch`

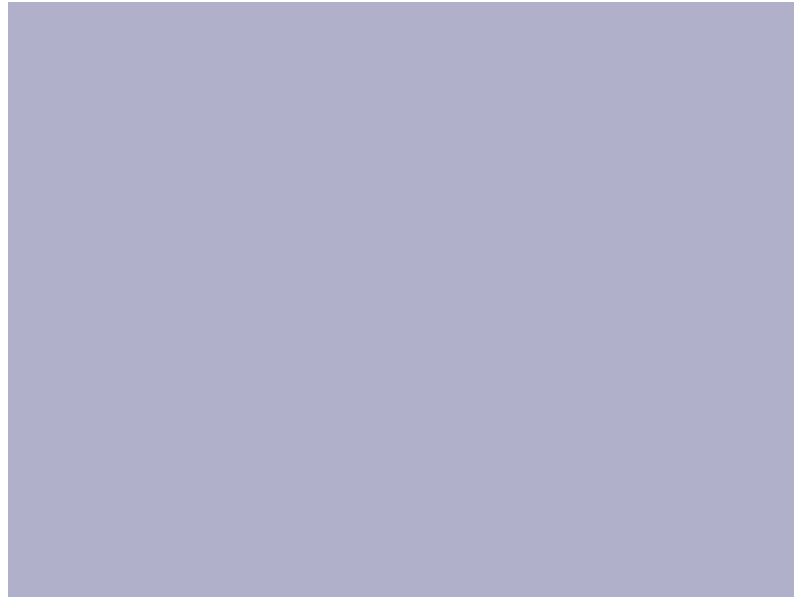

# Inverse Kinematics using ik\_ros

- ik\_ros is a standardized interface to several IK solvers
- IK Setup node
  - Listens to input streams of data (e.g. /tf) that define the task space goal
  - Packs/publishes an IK problem message
- IK Solver node
  - Interfaces with a given solver (currently supported: EXOTica, trac\_ik, pybullet)
  - Solves problem and publishes solution
- Services:
  - Solve ik
  - Toggle IK callback (start/stop)
- ik\_ros is extensible: straightforward to add additional/custom IK interfaces

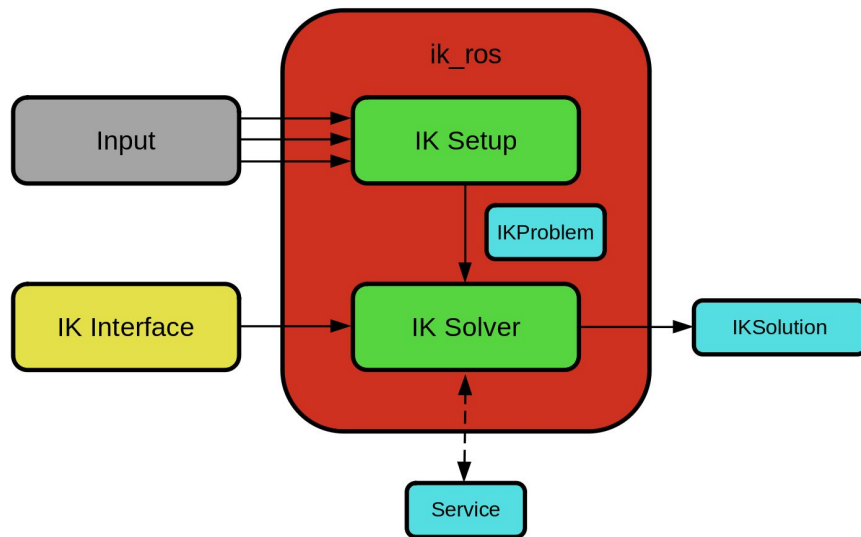

# Leverage ROS ecosystem (teleop+LfD)

1. `$ roslaunch rpbi_examples lfd.launch`

Keys:

1. Move robot to start configuration
2. Start/stop teleoperation demo
3. Learn, plan and execute LfD

left/right/up/down direction keys  
move end-effector when in  
teleoperation demo

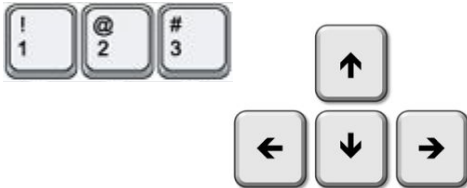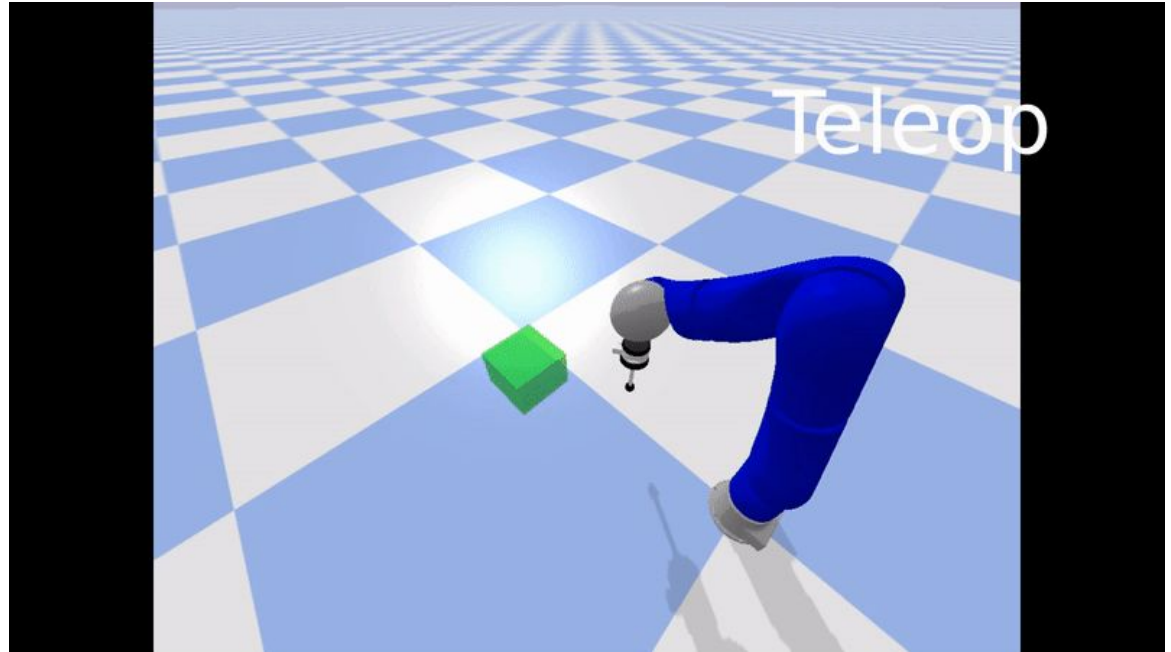

# Thank you

Questions, feedback, pull requests welcome!
